# Supplementary material for: Investigation of N-Acetyltransferase 2-Mediated Drug Interactions of Amifampridine: In Vitro and In Vivo Evidence of Drug Interactions with Acetaminophen
Source: MDPI journal article supplement (doi:10.3390/pharmaceutics15051471), 2023-05-11

## SUPPLEMENTAL INFORMATION

# Investigation of *N*-Acetyltransferase 2-Mediated Drug Interactions of Amifampridine: In Vitro and In Vivo Evidence of Drug Interactions with Acetaminophen

Yeo-Dim Park, Yoon-Jee Chae and Han-Joo Maeng

### Supplementary Figure S1.

Inhibitory effects of acetaminophen (300  $\mu$ M) on the metabolism of amifampridine (50  $\mu$ M) to 3-*N*-acetylamifampridine in vitro in rat liver and intestinal S9 fractions. Data are expressed as the mean  $\pm$  SD (n=3).

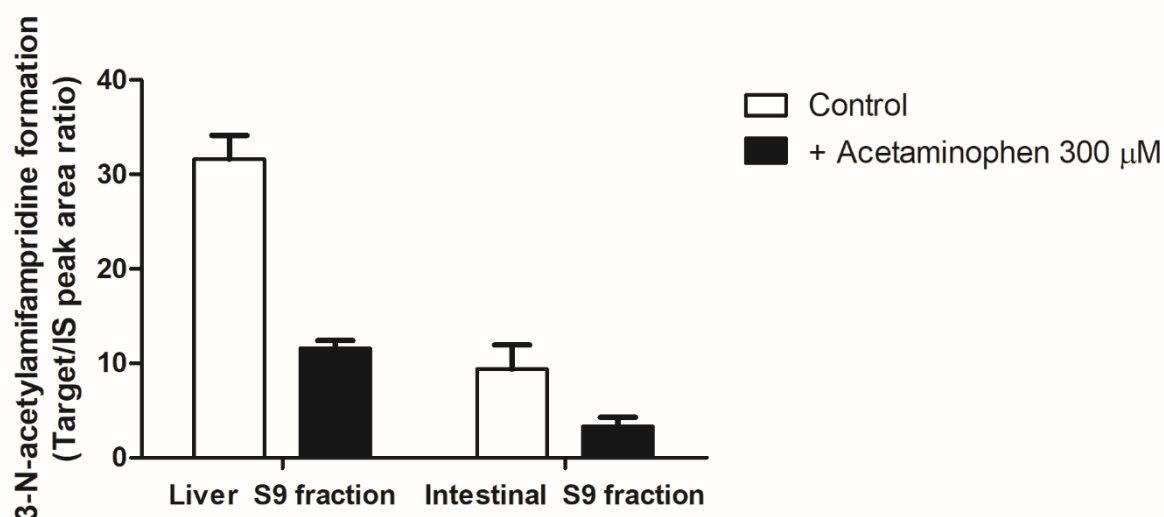

Supplement: s1 [file s1]
